# Supplementary material for: Glioblastoma cellular MAP4K1 facilitates tumor growth and disrupts T effector cell infiltration
Source: PubMed Central journal article supplement (PMC10514360; doi:10.26508/lsa.202301966), 2023-09-21
Supplement: LSA-2023-01966_SdataFS6.pdf [file LSA-2023-01966_SdataFS6.pdf]

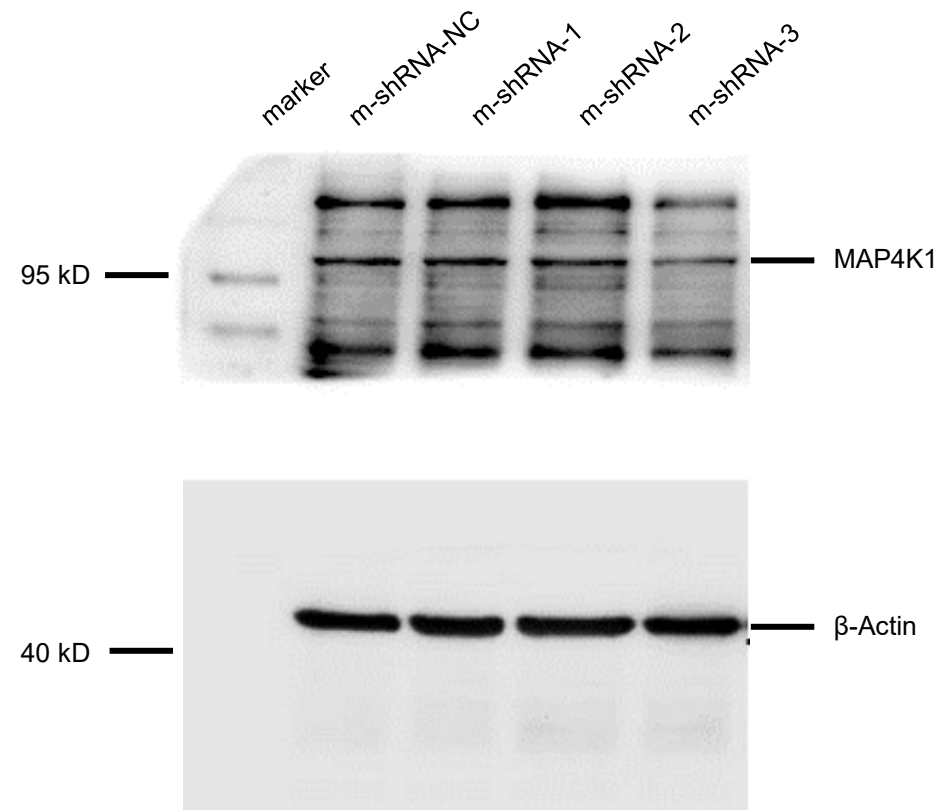

**Figure S6A**
